# Supplementary material
Source: Elsevier journal article supplement (https://www.sciencedirect.com/science/article/pii/S030089321630330X)
Supplement: mmc1 [file S030089321630330X:mmc1.docx]

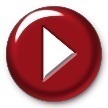
 **Supplementary material**

_____________________________________________________________________________________

**Impact on Mortality of Different Network Systems in the Treatment of ST-segment Elevation Acute Myocardial Infarction. The Spanish Experience**

______________________________________________________________________________________

# Origen de los datos. Bases de datos del Sistema Nacional de Salud

Los datos utilizados en este se han obtenido del conjunto mínimo básico de datos (CMBD), del Sistema Nacional de Salud, que incluye las altas registradas en los hospitales públicos generales (de la red de utilización pública y/o administrados públicamente o con concierto sustitutorio) y utiliza la Clasificación Internacional de Enfermedades –novena revisión– modificación clínica (CIE-9-MC) para codificar los diagnósticos y procedimientos1.

El CMBD recoge 3.316.949 episodios de alta con diagnóstico principal de enfermedades del área del corazón en los hospitales del Sistema Nacional de Salud en los años 2003 y 2012, entendiendo por enfermedades del área del corazón aquellas cuyo diagnóstico principal está comprendido en los dígitos de la CIE-9-MC que se recogen en la tabla 12.

Entre estos registros del CMBD se han seleccionado los 302.471 episodios con diagnóstico principal infarto agudo de miocardio: códigos 410.*1 de la CIE-9-CM, que incluye infarto agudo de miocardio con y sin elevación persistente del segmento ST, exceptuando los episodios de atención subsiguiente (aquellos otros que, siempre dentro de las ocho primeras semanas, tuviera el paciente para observación, estudio, seguimiento, convalecencia o tratamiento3,4).

# Ajuste por riesgo de la mortalidad intrahospitalaria por infarto agudo de miocardio

Para ajustar por riesgo la mortalidad intrahospitalaria por infarto agudo de miocardio se ha seguido la metodología utilizada en el estudio “Mortalidad intrahospitalaria por infarto agudo de miocardio. Relevancia del tipo de hospital y la atención dispensada”5, en cuyo material suplementario se describe con detalle.

Como factores de riesgo se han considerado los indicados en la tabla 2, que corresponden al modelo publicado por el *Institute of Clinical Evaluative Sciences* de Ontario (Canadá), en 1999 (ICES 1999)6 y se han obtenido los resultados que se muestran en la tabla 3, mediante regresión logística binaria, y en la tabla 4 mediante regresión logística multinivel, según la metodología de *Centers for Medicare & Medicaid Services*7-9.

A partir del modelo multinivel estimado, se ha calculado: 1) La mortalidad prevista, que es el número *previsto* de fallecimientos por infarto agudo de miocardio estimado a partir de las variables individuales (mix de pacientes) y el componente de cada hospital correspondiente a la ordenada en el origen (funcionamiento), mediante la opción de predicciones de STATA 13, incluyendo todas las variables dependientes, todos los coeficientes fijos y todos los efectos aleatorios correspondientes al nivel 2 (hospital); 2) La mortalidad esperada, que es el número esperado de fallecimientos por infarto agudo de miocardio en cada hospital, estimado a partir de las variables individuales (mix de pacientes) y la media de los componentes de cada hospital correspondientes a la ordenada en el origen (funcionamiento estándar), mediante la opción de predicciones de STATA 13, incluyendo todas las variables dependientes y todos los coeficientes fijos, pero no los efectos aleatorios correspondientes al nivel 2 (hospital); y 3) La razón de mortalidad intrahospitalaria estandarizada por riesgo (RAMER) como el cociente entre la mortalidad prevista y la esperada, multiplicado por la tasa bruta de mortalidad8,10.

La RAMER es un valor expresado en la misma magnitud que la tasa bruta de mortalidad; de forma que si la razón de mortalidad intrahospitalaria estandarizada por riesgo de un hospital es mayor que la tasa bruta de mortalidad, significa que la probabilidad de letalidad en dicho hospital a causa de factores relacionados con su funcionamiento es mayor que en la media de los hospitales considerados.

**Ajuste para evaluar el impacto de la implementación de sistemas organizados para la atención del infarto agudo de miocardio con elevación del segmento ST**

A partir de la RAMER y la tasa de PCI por comunidad autónoma y año, se especificaron diferentes modelos para evaluar el impacto de las intervenciones (puesta en marcha de sistemas organizados de atención al infarto agudo de miocardio con elevación del segmento ST en las diferentes comunidades autónomas) en la razón de incidencia (RI) de las variables de resultado. Se evaluó la bondad del ajuste de los diferentes modelos calculados y se obtuvo un ajuste razonablemente bueno para la RAMER con el modelo de regresión de Poisson (el test de la χ2 no fue estadísticamente significativo). Para el análisis de los procedimientos de PCI, debido a la existencia de sobredispersión en los datos, se ajustó un modelo de regresión binomial negativa y se estimó el parámetro de sobredispresión (lnalpha < 0,05), por lo que se consideró este modelo más adecuado que el de Poissson11.

**Tabla 1**

Distribución de altas por enfermedades del área del corazón en los hospitales del Sistema Nacional de Salud 2003-2012

| **Diagnósticos principales de alta** | **Nº** | **% sobre el total** | **Códigos CIE-9-MC** |
| --- | --- | --- | --- |
| Fiebre reumática aguda | 1.056 | 0,0 | 390-392 |
| Enfermedad cardiaca reumática crónica | 70.641 | 2,1 | 393-398 |
| Enfermedad hipertensiva | 225.934 | 6,8 | 401-405 |
| Infarto agudo de miocardio | 522.549 | 15,8 | 410 |
| Otras enfermedades isquémicas del corazón | 593.411 | 17,9 | 411,412-414 |
| Angina de pecho | 108.174 | 3,3 | 413 |
| Enfermedades de la circulación pulmonar | 136.260 | 4,1 | 415-417 |
| Trastornos de conducción y disrritmias cardiacas | 568.777 | 17,1 | 426-227 |
| Insuficiencia cardiaca | 847.537 | 25,6 | 428 |
| Otras enfermedades cardiacas | 230.664 | 7,0 | Resto de 420-429 |
| Aneurisma de la aorta ascendente o torácica, embolismo aórtico torácico | 11.946 | 0,4 | 441.01 441.1 441.2 444.1 |
| **Total** | 3.316.949 | 100,0 |  |

**Tabla 2**

Descripción de las variables (CIES, 1999)

| **Variable** | **Descripción** | **Códigos CIE-9-CM** | **Prevalencia (%)** |
| --- | --- | --- | --- |
| Mortalidad intrahospitalaria (observada) | Variable dependiente.  1 = fallecimiento durante el episodio de hospitalización  0 = alta con motivo diferente de fallecimiento |  |  |
| Edad | Cuantitativa discreta (años).  34 < edad < 95 |  |  |
| Sexo | Cualitativa nominal dicotómica  1 = mujer  0 = varón (categoría de referencia). |  | 28,6 |
| *Shock* | Cualitativas nominales dicotómicas (*).  1= Código de diagnóstico secundario presente en el registro del CMBD-H.  0 = Código de diagnóstico secundario ausente en el registro del CMBD-H. | 785.5 | 6,2 |
| Diabetes con complicaciones | 250.1 - 250.9 | 4,0 |
| Insuficiencia cardiaca congestiva | 428.x | 18,0 |
| Tumor maligno | 140.0 - 208.9 | 2,2 |
| Enfermedad cerebrovascular | 430.0 - 438.x | 4,0 |
| Edema de pulmón | 518.4, 514.x | 0,8 |
| Insuficiencia renal aguda | 584.x, 586.x, 788.5 | 5,5 |
| Insuficiencia renal crónica | 585.x, 403.x, 404.x, 996.7,  394.2, 399.4, v451 | 7,7 |
| Arritmia | 427.0 - 427.9 | 19,7 |
| En todos los casos el test χ2 muestra que existe asociación entre la mortalidad observada y las variables dependientes (p = 0,001). | | | |

**Tabla 3**

Ajuste del modelo de regresión logística para la mortalidad intrahospitalaria por infarto agudo de miocardio 2003-2012 (CIES, 1999)

|  | **p** | **OR** | **IC OR 95%** | |
| --- | --- | --- | --- | --- |
| **INF.** | **SUP.** |
| Edad | < 0,001 | 1,068 | 1,067 | 1,069 |
| Sexo | < 0,001 | 1,156 | 1,128 | 1,184 |
| *Shock* | < 0,001 | 2,716 | 2,625 | 2,811 |
| Diabetes con complicaciones | < 0,001 | 1,373 | 1,313 | 1,437 |
| Insuficiencia cardiaca congestiva | < 0,001 | 1,711 | 1,667 | 1,755 |
| Tumor maligno | < 0,001 | 1,955 | 1,844 | 2,072 |
| Enfermedad cerebrovascular | < 0,001 | 2,302 | 2,209 | 2,400 |
| Edema de pulmón | < 0,001 | 2,739 | 2,502 | 2,997 |
| Insuficiencia renal aguda | < 0,001 | 2,368 | 1,282 | 2,457 |
| Arritmia | < 0,001 | 1,714 | 1,671 | 1,758 |
| La variable insuficiencia renal crónica resulta no significativa.  Seudo R2 = 0,2943.  χ2 Hosmer-Lemeshow: 102,45; g.l: 8, p = 0,001.  AROC: 0,863; IC95%: (0,862-0,865), p = 0,001  AROC: área bajo la curva ROC; IC OR 95%: intervalo de confianza de los odds ratio al 95%; INF: límite inferior del IC; OR: *odds ratio*; SUP: límite superior del IC. | | | | |

**Tabla 4**

Ajuste del modelo de regresión logística multinivel para la mortalidad intrahospitalaria por infarto agudo de miocardio 2003-2012 (variables CIES, 1999)

|  | **p** | **OR** | **IC 0R (95%)** | |
| --- | --- | --- | --- | --- |
| **INF.** | **SUP.** |
| Edad | < 0,001 | 1,068 | 1,067 | 1,070 |
| Sexo | < 0,001 | 1,149 | 1,122 | 1,176 |
| *Shock* | < 0,001 | 28,080 | 27,172 | 29,019 |
| Diabetes con complicaciones | < 0,001 | 1,420 | 1,359 | 1,483 |
| Insuficiencia cardiaca congestiva | < 0,001 | 1,754 | 1,711 | 1,799 |
| Tumor maligno | < 0,001 | 1,970 | 1,863 | 2,083 |
| Enfermedad cerebrovascular | < 0,001 | 2,326 | 2,236 | 2,420 |
| Edema de pulmón | < 0,001 | 2,652 | 2,442 | 2,716 |
| Insuficiencia renal aguda | < 0,001 | 2,471 | 2,388 | 2,558 |
| Arritmia | < 0,001 | 1,747 | 1,705 | 1,789 |
| La variable Insuficiencia renal crónica resulta no significativa.  VAR = 0,103 ICH = 0,032 MOR = 1,3691  AROC mortalidad prevista: 0,868; IC95% (0,866-0,870); p = 0,001  AROC mortalidad esperada: 0,865; IC95% (0,864-0,867); p = 0,001  ICH: coeficiente de correlación “intrahospitales”; IC 0R (95%), intervalo de confianza de los *odds ratio* al 95%; INF: límite inferior del IC; SUP: límite superior del IC; MOR: *odds ratio* mediana; OR: *odds ratio*; VAR: varianza de la ordenada en el origen –Intercept- correspondiente al nivel “hospital”. | | | | |

BIBLIOGRAFÍA

1. Ministerio de Sanidad y Consumo . Metodología de análisis de la hospitalización en el Sistema Nacional de Salud. Modelo de indicadores basado en el Registro de Altas (CMBD) Madrid: Agencia de Calidad del Sistema Nacional de Salud; 2007. [citado 4 Jun 2016]. Disponible en:

<http://www.msssi.gob.es/estadEstudios/estadisticas/docs/metod_modelo_cmbd_pub.pdf>

2. Palanca I, Castro A, Macaya C, Elola FJ, Bernal JL, Paniagua JL. Grupo de Expertos. Unidades asistenciales del área del corazón. Estándares y recomendaciones. Agencia de Calidad del SNS. Madrid, MSPS 2011. [citado 4 Jun 2016]. Disponible en:

<http://www.msssi.gob.es/organizacion/sns/planCalidadSNS/docs/EERR/EyR_UAC.pdf>

3. Codificación Clínica con la CIE-9-MC. Unidad Técnica de la CIE-9-MC para el Sistema Nacional de Salud. Actualización de la CIE-9-MC 2008. Comentarios y Normativa de Codificación. Boletín nº 28. Febrero 2008. [citado 4 Jun 2016]. Disponible en:

<http://www.msc.es/estadEstudios/estadisticas/normalizacion/clasifEnferm/boletines/Codificacion_clinica_n28_08.pdf>

4. Codificación Clínica con la CIE-9-MC. Unidad Técnica de la CIE-9-MC para el Sistema Nacional de Salud. Cardiología, Hipertensión Arterial y Enfermedad Cerebrovascular. Ministerio de Sanidad y Política Social. Boletín nº 30. Octubre 2008. [citado 4 Jun 2016]. Disponible en:

<http://www.msc.es/estadEstudios/estadisticas/normalizacion/clasifEnferm/boletines/Codificacion_clinica_n30_08.pdf>

5. Bertomeu V, Cequier Á, Bernal JL, Alfonso F, Anguita MP, Muñiz J, et al. Mortalidad intrahospitalaria por infarto agudo de miocardio. Relevancia del tipo de hospital y la atención dispensada3. Estudio RECALCAR. Rev Esp Cardiol. 2013;66:935-42.

6. Institute for Clinical Evaluative Sciences. Cardiovascular health services in Ontario. An ICES Atlas. Ontario: ICES, 1999. [citado 4 Jun 2016]. Disponible en:

<http://www.ices.on.ca/webpage.cfm?site_id=1&org_id=67&morg_id=0&gsec_id=0&item_id=1390&type=atlas>

7. Krumholz HM, Normand SLT, Galusha DH. Risk Adjustment Models for AMI and HF: 30 Day Mortality: Report prepared for the Centers for Medicare & Medicaid Services. 2005. Mortality Measures section. [citado 4 Jun 2016]. Disponible en: <http://www.qualitynet.org>

8. Krumholz HM, Wang Y, Mattera JA, Wang Y, Han LF, Ingber MJ, et al. An administrative claims model suitable for profiling hospital performance based on 30-day mortality rates among patients with an acute myocardial infarction. Circulation. 2006;113:1683-92.

9. Bernheim SB, Li Z, Grad JN. 2011 Measures Maintenance Technical Report: Acute Myocardial Infarction, Heart Failure, and Pneumonia 30 Day Risk Standardized Readmission Measures: Report prepared for the Centers for Medicare & Medicaid Services. 2011. The Mortality Measures section. [citado 4 Jun 2016]. Disponible en: <http://www.qualitynet.org>

10. Shahian DM, Torchiana DF, Shemin RJ, Rawn JD, Normand SLT. The Massachusetts cardiac surgery report card: implications of statistical methodology. Ann Thorac Surg. 2005;80:2106–13.

11. Long, JS, Freese J. Regression Models for Categorical Dependent Variables Using Stata, Second Edition. 2006. College Station, TX: Stata Press.
